# Supplementary material for: Pragmatic Carbohydrate Quality Metrics in Relation to Glycemic Index, Glycemic Load, and Front-of-Pack Warning Labels in Grain Foods
Source: MDPI journal article supplement (doi:10.3390/foods13091299), 2024-04-24

## Supplementary Material - Foods

### Pragmatic carbohydrate quality metrics in relation to glycemic index, glycemic load, and front-of-pack warning labels in grain foods

Mariane de Mello Fontanelli, Lais Duarte Batista, Angela Martinez Arroyo, Dariush Mozaffarian, Renata Micha, Marcelo Macedo Rogero, Regina Mara Fisberg, Flavia Mori Sarti

**Corresponding author:** Flavia Mori Sarti, School of Arts, Sciences and Humanities (EACH), University of São Paulo, São Paulo-SP, Brazil

E-mail: flamori@usp.br

#### Table of contents

|                                                                                                                                                                                                                                  |    |
|----------------------------------------------------------------------------------------------------------------------------------------------------------------------------------------------------------------------------------|----|
| <b>Table S1.</b> Characteristics of participants in the 2015 Health Survey of Sao Paulo, according to dietary recall information.....                                                                                            | 2  |
| <b>Table S2.</b> Grain foods meeting carbohydrate metrics weighted by frequency of consumption by the population of Sao Paulo $\geq 12$ years, 2015 Health Survey of Sao Paulo.....                                              | 3  |
| <b>Table S3.</b> Glycemic index and glycemic load of grain foods according to categorization in carbohydrate quality metrics excluding foods with GI values $\leq P1$ and $\geq P99$ ( $n=7$ ), 2015 Health Survey of Sao Paulo. | 4  |
| <b>Table S4.</b> Comparison of glycemic index and glycemic load of grain foods meeting or not meeting each carbohydrate metric weighted by frequency of consumption, 2015 Health Survey of Sao Paulo. ....                       | 5  |
| <b>Table S5.</b> Comparison of glycemic index and glycemic load of grain foods according to the carbohydrate metrics, 2015 Health Survey of Sao Paulo. ....                                                                      | 6  |
| <b>Table S6.</b> Comparison of consumed grain foods meeting at least one criterion of the front-of-pack warning labels according to carbohydrate metrics, 2015 Health Survey of Sao Paulo ( $n=244$ ). ....                      | 8  |
| <b>Table S7.</b> Contents of critical nutrients in nutrient profiling models according to carbohydrate quality metrics, 2015 Health Survey of Sao Paulo. ....                                                                    | 10 |
| <b>Figure S1.</b> Flowchart of study participants, 2015 Health Survey of Sao Paulo.....                                                                                                                                          | 11 |

**Table S1.** Characteristics of participants in the 2015 Health Survey of Sao Paulo, according to dietary recall information.

| Population characteristics              | Sample<br>(n=4,058) |                         | Subsample with at least<br>one dietary recall (n=1,741) <sup>e</sup> |                  |
|-----------------------------------------|---------------------|-------------------------|----------------------------------------------------------------------|------------------|
|                                         | n                   | % (95% CI) <sup>c</sup> | n                                                                    | % (95% CI)       |
| Age group, years                        |                     |                         |                                                                      |                  |
| 12-19                                   | 864                 | 13.5 (12.4-14.7)        | 553                                                                  | 23.2 (20.9-25.7) |
| 20-59                                   | 2,169               | 70.4 (68.71-72.1)       | 643                                                                  | 54.2 (51.5-56.8) |
| ≥ 60                                    | 1,025               | 16.1 (14.3-17.9)        | 545                                                                  | 22.7 (19.9-25.7) |
| Sex                                     |                     |                         |                                                                      |                  |
| Male                                    | 1,774               | 46.9 (45.3-48.4)        | 837                                                                  | 50.0 (47.2-52.9) |
| Female                                  | 2,284               | 53.1 (51.6-54.7)        | 904                                                                  | 50.0 (47.1-52.8) |
| Education level <sup>a</sup>            |                     |                         |                                                                      |                  |
| < High school graduate                  | 2,088               | 44.9 (41.7-48.2)        | 980                                                                  | 50.8 (47.0-54.7) |
| High school graduate/equivalent         | 956                 | 25.2 (23.4-27.1)        | 366                                                                  | 22.4 (20.1-24.9) |
| College or some college                 | 931                 | 29.9 (26.2-33.8)        | 358                                                                  | 26.8 (23.1-30.8) |
| Family income per capita <sup>a,b</sup> |                     |                         |                                                                      |                  |
| ≤ 1 minimum wage                        | 1,722               | 40.9 (36.9-45.1)        | 769                                                                  | 42.6 (37.8-47.6) |
| > 1 and ≤ 3 minimum wages               | 1,227               | 33.2 (30.0-36.5)        | 517                                                                  | 32.9 (29.0-37.1) |
| > 3 minimum wages                       | 261                 | 8.8 (6.9-11.3)          | 123                                                                  | 9.6 (7.0-13.0)   |
| Don't know response                     | 643                 | 17.1 (13.1-22.0)        | 257                                                                  | 14.9 (10.6-20.6) |
| Ethnicity <sup>a</sup>                  |                     |                         |                                                                      |                  |
| White and yellow                        | 2,066               | 52.9 (49.5-56.3)        | 865                                                                  | 51.1 (47.4-54.8) |
| Black, brown, and indigenous            | 1,963               | 47.1 (43.7-50.5)        | 863                                                                  | 48.9 (45.2-52.7) |

CI, confidence interval.

<sup>a</sup> Numbers may not sum to the total number of participants due to missing data.

<sup>b</sup> Minimum wage was 236.17 US dollars (788 Brazilian Real) in 2015.

<sup>c</sup> Percentages and 95% confidence intervals were survey weighted.

**Table S2.** Grain foods meeting carbohydrate metrics weighted by frequency of consumption by the population of Sao Paulo  $\geq 12$  years, 2015 Health Survey of Sao Paulo.

| Grain food categories <sup>a</sup>                    | # <sup>b</sup> | % (95%CI) <sup>c</sup> | Percent meeting each metric <sup>d</sup> |                      |                       |                       |
|-------------------------------------------------------|----------------|------------------------|------------------------------------------|----------------------|-----------------------|-----------------------|
|                                                       |                |                        | 10:1                                     | 10:1:1               | 10:1:2                | 10:1 1:2              |
|                                                       |                |                        | % (95%CI)                                | % (95%CI)            | % (95%CI)             | % (95%CI)             |
| Flour and dry mixes                                   | 9              | 10.0 (1.3-0.5)         | 1.4 (0.1-11.8)                           | 1.4 (0.1-11.8)       | 1.4 (0.1-11.8)        | 1.4 (0.1-11.8)        |
| Yeast breads, rolls                                   | 50             | 30.3 (08.3-67.5)       | 6.1 (0.9-32.1)                           | 0.8 (0.2-4.2)        | 6.1 (0.9-32.1)        | 6.1 (0.9-32.1)        |
| Quick breads                                          | 5              | 0.5 (0.1-3.1)          | 0.0 (-)                                  | 0.0 (-)              | 0.0 (-)               | 0.0 (-)               |
| Cakes, cookies, pies, pastries, bars                  | 110            | 7.7 (3.2-17.4)         | 2.3 (0.7-7.1)                            | 0.0 (-)              | 0.0 (-)               | 0.0 (-)               |
| Crackers and salty snacks from grain products         | 27             | 7.1 (1.9-23.1)         | 6.4 (1.19-27.9)                          | 6.2 (1.1-27.7)       | 6.4 (1.2-27.9)        | 6.4 (1.2-27.9)        |
| Pancakes, waffles, French toast, other grain products | 5              | 0.2 (00.0-1.07)        | 0.0 (-)                                  | 0.0 (-)              | 0.0 (-)               | 0.0 (-)               |
| Pastas, cooked cereals, rice                          | 24             | 42.4 (12.4-79.2)       | 0.9 (0.1-7.2)                            | 0.9 (0.1-7.2)        | 0.9 (0.1-7.2)         | 0.9 (0.1-7.2)         |
| Cereals, not cooked or NS as to cooked                | 14             | 1.8 (0.5-5.8)          | 69.2 (26.7-93.3)                         | 43.8 (9.1-85.9)      | 44.8 (9.6-86.1)       | 51.3 (13.5-87.7)      |
| <b>Overall</b>                                        | <b>244</b>     | <b>100.0 (-)</b>       | <b>4.3 (1.5-11.7)</b>                    | <b>2.0 (0.7-6.0)</b> | <b>3.6 (1.2-10.9)</b> | <b>3.8 (1.2-11.0)</b> |

CI, confidence interval.

<sup>a</sup> Food groups “Grain mixtures, frozen plate meals, soups” and “Meat substitutes, mainly cereal protein” were suppressed given the lack of products meeting these categories, since grain foods were evaluated with mixed dishes disaggregated.

<sup>b</sup> Absolute number of grain products in the 2015 Health Survey of São Paulo dataset.

<sup>c</sup> Products were weighted by their actual reported consumption levels (products consumed more frequently received larger weight).

<sup>d</sup> Metrics were applied per 10g of total carbohydrate: 1)  $\geq 1$ g fiber (10:1), 2)  $\geq 1$ g fiber and  $< 1$ g free sugars (10:1:1), 3)  $\geq 1$ g fiber and  $< 2$ g free sugars (10:1:2); and 4)  $\geq 1$ g fiber and, per 1 g of fiber,  $< 2$ g free sugars (10:1|1:2).

The most commonly consumed food groups weighted by the frequency of consumption in the population were “Pastas, cooked cereals, rice” (42.4%), followed by “Yeast bread, rolls” (30.3%), “Flour and dry mixes” (10%), “Cakes, cookies, pies, pastries, bars” (7.7%), “Crackers and salty snacks from grain products” (7.1%), “Cereals, not cooked or NS as to cooked” (1.8%), “Quick breads” (0.5%), and “Pancakes, waffles, French toast, other grain products” (0.2%). Notably, when weighted by frequency of consumption, the proportion of grain foods meeting each metric was much lower than the analysis by food item. The 10:1 metric was met by 4.3% of grain foods, followed by the 10:1|1:2 (3.8%), 10:1:2 (3.6%) and 10:1:1 (2%), indicating that healthier grain foods meeting the metrics were less frequently consumed by the population than products that did not meet the metrics.

Table S3. Glycemic index and glycemic load of grain foods according to categorization in carbohydrate quality metrics excluding foods with GI values  $\leq P1$  and  $\geq P99$  (n=7), 2015 Health Survey of Sao Paulo.

| Carbohydrate metrics <sup>1</sup> | Glycemic index |              |                         |         | Glycemic load |                 |                         |         |
|-----------------------------------|----------------|--------------|-------------------------|---------|---------------|-----------------|-------------------------|---------|
|                                   | Mean (SE)      | Median (IQR) | Diff. (SE) <sup>2</sup> | P-value | Mean (SE)     | Median (IQR)    | Diff. (SE) <sup>b</sup> | P-value |
| 10:1                              |                |              |                         |         |               |                 |                         |         |
| Yes                               | 59.8 (2.1)     | 64.9 (23.5)  | -5.8 (2.2)              | 0.008   | 11.9 (1.2)    | 11.8 (9.5)      | -9.7 (1.7)              | <0.001  |
| No                                | 65.6 (0.6)     | 66.7 (4.3)   |                         |         | 21.6 (1.2)    | 17.6 (14.9)     |                         |         |
| 10:1:1                            |                |              |                         |         |               |                 |                         |         |
| Yes                               | 57.1 (3.1)     | 56.9 (26.9)  | -8.4 (3.1)              | 0.007   | 9.5 (1.6)     | 8.6 (8.2)       | -11.8 (1.9)             | <0.001  |
| No                                | 65.5 (0.6)     | 66.7 (4.4)   |                         |         | 21.2 (1.1)    | 17.1 (13.8)     |                         |         |
| 10:1:2                            |                |              |                         |         |               |                 |                         |         |
| Yes                               | 60.1 (2.7)     | 66.6 (4.3)   | -5.3 (2.7)              | 0.051   | 11.2 (1.5)    | 10.7 (11.1)     | -10.1 (1.8)             | <0.001  |
| No                                | 65.3 (0.6)     | 67.9 (25.1)  |                         |         | 21.4 (1.1)    | 17.1 (14.1)     |                         |         |
| 10:1 1:2                          |                |              |                         |         |               |                 |                         |         |
| Yes                               | 59.4 (2.5)     | 67.1 (24.4)  | -6.1 (2.5)              | <0.001  | 11.4 (1.5)    | 10.7 (11.1)     | -10.0 (1.8)             | <0.001  |
| No                                | 65.5 (0.6)     | 66.6 (4.3)   |                         |         | 21.4 (1.1)    | 17.1 (14.11336) |                         |         |
| <b>Overall</b>                    | 64.7 (0.6)     | 66.7 (5.1)   |                         |         | 20.2 (1.0)    | 16.3 (14.0)     |                         |         |

IQR, interquartile range; SE, standard error; Diff., difference.

<sup>1</sup> Metrics were applied per 10g of total carbohydrate: 1)  $\geq 1$ g fiber (10:1), 2)  $\geq 1$ g fiber and  $< 1$ g free sugars (10:1:1), 3)  $\geq 1$ g fiber and  $< 2$ g free sugars (10:1:2); and 4)  $\geq 1$ g fiber and, per 1 g of fiber,  $< 2$ g free sugars (10:1|1:2).

<sup>2</sup>  $\beta$  coefficient for linear regression model with robust variance.

<sup>3</sup> Yes, foods that met the respective carbohydrate metric.

<sup>4</sup> No, foods that did not meet the respective carbohydrate metric.

**Table S4.** Comparison of glycemic index and glycemic load of grain foods meeting or not meeting each carbohydrate metric weighted by frequency of consumption, 2015 Health Survey of Sao Paulo.

| Carbohydrate metrics <sup>1</sup> | Glycemic index |              |                         |                      | Glycemic load |              |             |         |
|-----------------------------------|----------------|--------------|-------------------------|----------------------|---------------|--------------|-------------|---------|
|                                   | Mean (SE)      | Median (IQR) | Diff. (SE) <sup>2</sup> | P-value <sup>3</sup> | Mean (SE)     | Median (IQR) | Diff. (SE)  | P-value |
| 10:1                              |                |              |                         |                      |               |              |             |         |
| Yes <sup>4</sup>                  | 58.6 (6.8)     | 67.9 (24.4)  | -7.1 (7.2)              | 0.33                 | 7.9 (2.4)     | 11.1 (10.8)  | -10.7 (2.8) | <0.001  |
| No <sup>5</sup>                   | 65.7 (2.3)     | 68.4 (10.2)  |                         |                      | 21.4 (2.3)    | 18.3 (11.5)  |             |         |
| 10:1:1                            |                |              |                         |                      |               |              |             |         |
| Yes                               | 47.1 (7.8)     | 47.6 (39.9)  | -18.7 (8.1)             | <b>0.02</b>          | 7.9 (2.4)     | 4.5 (8.4)    | -13.4 (3.3) | <0.001  |
| No                                | 65.8 (2.2)     | 69 (10.2)    |                         |                      | 21.4 (2.3)    | 18.3 (11.5)  |             |         |
| 10:1:2                            |                |              |                         |                      |               |              |             |         |
| Yes                               | 58.2 (8.0)     | 72 (30.1)    | -7.5 (8.3)              | 0.37                 | 10.0 (1.7)    | 11.1 (6.6)   | -11.5 (2.8) | <0.001  |
| No                                | 65.7 (2.3)     | 68.3 (10.2)  |                         |                      | 21.2 (4.4)    | 19.9 (22.7)  |             |         |
| 10:1 1:2                          |                |              |                         |                      |               |              |             |         |
| Yes                               | 58.0 (7.8)     | 72 (26.91)   | -7.7 (8.1)              | 0.34                 | 10.4 (1.7)    | 11.1 (7.7)   | -11.1 (2.8) | <0.001  |
| No                                | 65.7 (2.3)     | 68.3 (10.2)  |                         |                      | 21.5 (2.3)    | 18.3 (11.5)  |             |         |
| <b>Overall</b>                    | 65.4 (9.1)     | 68.4 (10.2)  |                         |                      | 21.1 (2.3)    | 18.3 (11.5)  |             |         |

Diff., difference; IQR, interquartile range; SE, standard error.

<sup>1</sup> Metrics were applied per 10g of total carbohydrate: 1)  $\geq 1$ g fiber (10:1), 2)  $\geq 1$ g fiber and  $< 1$ g free sugars (10:1:1), 3)  $\geq 1$ g fiber and  $< 2$ g free sugars (10:1:2); and 4)  $\geq 1$ g fiber and, per 1 g of fiber,  $< 2$ g free sugars (10:1|1:2).

<sup>2</sup>  $\beta$  coefficient for linear regression weighted by frequency of consumption.

<sup>3</sup> P-values marked with bold indicate statistically significant p-values.

<sup>4</sup> Yes, foods that met the respective carbohydrate metric.

<sup>5</sup> No, foods that did not meet the respective carbo-hydrate metric.

Weighted by the population frequency of consumption, the mean GI was similar to the non-weighted value (65.4 *versus* 64.6, respectively), but the mean GL increased from 19.9 g in the non-weighted GL to 21.1 g in the weighted analysis, indicating that food items with higher GL were more frequently consumed. The difference between GI across carbohydrate metrics was no longer significant, except for the 10:1:1, which detected products with lower GI (-18.7, P value=0.022) when compared to those not meeting this metric.

All carbohydrate metrics identified grain foods with lower GL when the consumption of São Paulo's population was considered. The mean GL difference between grain foods meeting the carbohydrate metrics and not meeting the metrics was highest for the 10:1:1 (-13.4 g, P value<0.001) followed by the 10:1:2 (- 11.5 g, P value<0.001), the 10:1|1:2 (- 11.1 g, P value<0.001), and the 10:1 (-10.7 g, P value<0.001).

**Table S5.** Comparison of glycemic index and glycemic load of grain foods according to the carbohydrate metrics, 2015 Health Survey of Sao Paulo.

| Indicators                           | 10:1 <sup>3</sup> |                 |                |         | 10:1:1      |             |                |         | 10:1:2      |             |                |         | 10:1 1:2    |             |                |         | Overall       |
|--------------------------------------|-------------------|-----------------|----------------|---------|-------------|-------------|----------------|---------|-------------|-------------|----------------|---------|-------------|-------------|----------------|---------|---------------|
|                                      | Yes <sup>4</sup>  | No <sup>5</sup> | OR<br>(95% CI) | P-value | Yes         | No          | OR<br>(95% CI) | P-value | Yes         | No          | OR<br>(95% CI) | P-value | Yes         | No          | OR<br>(95% CI) | P-value | %<br>(95% CI) |
|                                      | %                 | %               |                |         | %           | %           |                |         | %           | %           |                |         | %           | %           |                |         |               |
|                                      | (95% CI)          | (95% CI)        |                |         | (95% CI)    | (95% CI)    |                |         | (95% CI)    | (95% CI)    |                |         | (95% CI)    | (95% CI)    |                |         |               |
| Glycemic index <sup>1</sup>          |                   |                 |                |         |             |             |                |         |             |             |                |         |             |             |                |         |               |
| By food item                         |                   |                 |                |         |             |             |                |         |             |             |                |         |             |             |                |         |               |
| Low                                  | 42.1              | 9.7             | 1.00           |         | 54.2        | 9.5         | 1.00           |         | 43.3        | 10.8        | 1.00           |         | 46.9        | 9.0         | 1.00           |         | 13.9          |
|                                      | (27.4-58.4)       | (6.3-14.6)      | (-)            |         | (34.1-72.9) | (6.3-14.2)  | (-)            |         | (26.8-61.5) | (7.2-15.7)  | (-)            |         | (30.3-64.2) | (5.8-13.7)  | (-)            |         | (10.1-18.9)   |
| Medium                               | 28.9              | 77.7            | 0.08           | <0.001  | 20.8        | 76.4        | 0.05           | <0.001  | 20.0        | 78.0        | 0.06           | <0.001  | 18.8        | 78.8        | 0.05           | <0.001  | 70.9          |
|                                      | (16.6-45.4)       | (71.4-82.9)     | (0.03-0.19)    |         | (8.7-42.0)  | (70.3-81.5) | (0.02-0.15)    |         | (9.1-38.4)  | (71.9-83.1) | (0.02-0.17)    |         | (8.5-36.4)  | (72.7-83.8) | (0.02-0.13)    |         | (64.8-76.3)   |
| High                                 | 28.9              | 12.6            | 0.48           | 0.136   | 25.0        | 14.1        | 0.31           | 0.041   | 36.7        | 12.1        | 0.68           | 0.45    | 34.4        | 12.3        | 0.54           | 0.211   | 15.2          |
|                                      | (16.6-45.4)       | (8.7-17.9)      | (0.18-1.26)    |         | (11.4-46.3) | (10.1-19.4) | (0.10-0.95)    |         | (21.3-55.3) | (8.4-17.3)  | (0.25-1.83)    |         | (19.9-52.5) | (8.5-17.4)  | (0.20-1.42)    |         | (11.2-20.3)   |
| Weighted by frequency of consumption |                   |                 |                |         |             |             |                |         |             |             |                |         |             |             |                |         |               |
| Low                                  | 35.7              | 10.1            | 1.00           |         | 65.8        | 10.1        | 1.00           |         | 36.3        | 10.2        | 1.00           |         | 38.3        | 10.1        | 1.00           |         | 11.2          |
|                                      | (11.5-70.5)       | (2.7-31.3)      | (-)            |         | (30.5-89.3) | (2.8-30.6)  | (-)            |         | (9.8-75.0)  | (2.8-31.2)  | (-)            |         | (11.1-75.5) | (2.7-31.2)  | (-)            |         | (3.4-31.1)    |
| Medium                               | 15.5              | 51.6            | 0.08           | 0.017   | 11.5        | 50.9        | 0.03           | 0.002   | 6.8         | 51.7        | 0.04           | 0.002   | 6.6         | 51.8        | 0.03           | 0.001   | 50.1          |
|                                      | (4.5-41.7)        | (17.7-84.1)     | (0.01-0.64)    |         | (3.0-35.2)  | (17.9-83.1) | (0.00-0.28)    |         | (1.8-22.7)  | (17.9-84.1) | (0.00-0.30)    |         | (1.8-2.2)   | (17.9-84.1) | (0.00-0.26)    |         | (18.1-82.0)   |
| High                                 | 48.7              | 38.3            | 0.34           | 0.441   | 22.7        | 39.0        | 0.09           | 0.066   | 56.8        | 38.0        | 0.42           | 0.522   | 55.1        | 38.1        | 0.38           | 0.473   | 38.7          |
|                                      | (16.9-81.6)       | (9.0-79.5)      | (0.03-4.90)    |         | (5.5-59.6)  | (9.9-79.0)  | (0.01-1.18)    |         | (20.1-87.3) | (9.0-79.3)  | (0.03-6.01)    |         | (19.5-86.1) | (9.0-79.3)  | (0.03-5.31)    |         | (10.0-78.3)   |
| Glycemic load <sup>2</sup>           |                   |                 |                |         |             |             |                |         |             |             |                |         |             |             |                |         |               |
| By food item                         |                   |                 |                |         |             |             |                |         |             |             |                |         |             |             |                |         |               |
| Low                                  | 44.7              | 16.0            | 1.00           |         | 66.7        | 15.5        | 1.00           |         | 53.3        | 15.9        | 1.00           |         | 53.1        | 15.6        | 1.00           |         | 20.5          |
|                                      | (29.7-60.8)       | (11.6-21.7)     | (-)            |         | (45.6-82.7) | (11.2-20.9) | (-)            |         | (35.4-70.4) | (11.5-21.5) | (-)            |         | (35.8-69.8) | (11.3-21.1) | (-)            |         | (15.9-26.1)   |
| Medium                               | 39.5              | 44.7            | 0.32           | 0.005   | 25.0        | 45.9        | 0.13           | <0.001  | 33.3        | 45.3        | 0.22           | 0.001   | 31.3        | 45.8        | 0.20           | <0.001  | 43.9          |
|                                      | (25.2-55.8)       | (38.0-52.0)     | (0.14-0.70)    |         | (11.4-46.3) | (39.4-52.6) | (0.05-0.35)    |         | (18.7-52.1) | (38.7-52.1) | (0.09-0.53)    |         | (17.5-49.4) | (39.1-52.5) | (0.08-0.48)    |         | (37.7-50.2)   |
| High                                 | 15.8              | 39.3            | 0.14           | <0.001  | 8.3         | 38.6        | 0.05           | <0.001  | 13.3        | 38.8        | 0.10           | <0.001  | 15.6        | 38.7        | 0.12           | <0.001  | 35.7          |
|                                      | (7.2-31.3)        | (32.8-46.2)     | (0.05-0.40)    |         | (2.0-28.7)  | (32.4-45.3) | (0.01-0.23)    |         | (5.0-31.1)  | (32.4-45.5) | (0.03-0.33)    |         | (6.5-32.9)  | (32.3-45.5) | (0.04-0.35)    |         | (29.9-41.9)   |
| Weighted by frequency of consumption |                   |                 |                |         |             |             |                |         |             |             |                |         |             |             |                |         |               |
| Low                                  | 33.6              | 3.9             | 1.00           |         | 70.7        | 3.8         | 1.00           |         | 39.0        | 3.9         | 1.00           |         | 38.0        | 3.9         | 1.00           |         | 5.2           |

|        |             |             |             |       |             |             |             |        |             |             |             |       |             |             |             |       |             |
|--------|-------------|-------------|-------------|-------|-------------|-------------|-------------|--------|-------------|-------------|-------------|-------|-------------|-------------|-------------|-------|-------------|
|        | (10.4-68.7) | (1.3-11.0)  | (-)         |       | (35.1-91.5) | (1.3-10.6)  | (-)         |        | (11.0-76.9) | (1.3-10.9)  | (-)         |       | (11.0-75.3) | (1.3-10.9)  | (-)         |       | (2.0-13.0)  |
|        | 55.4        | 51.8        | 0.12        |       | 16.7        | 52.7        | 0.02        |        | 51.4        | 52          | 0.1         |       | 49.8        | 52.1        | 0.1         |       | 52          |
| Medium | (22.3-84.3) | (17.8-84.2) | (0.02-0.90) | 0.039 | (4.4-46.9)  | (18.7-84.4) | (0.00-0.12) | <0.001 | (16.0-85.4) | (18.0-84.2) | (0.01-0.85) | 0.035 | (15.5-84.3) | (18.0-84.3) | (0.01-0.84) | 0.034 | (18.9-83.4) |
|        | 11          | 44.3        | 0.03        |       | 12.6        | 43.5        | 0.02        |        | 9.6         | 44.1        | 0.02        |       | 12.2        | 44          | 0.03        |       | 42.8        |
| High   | (2.8-34.3)  | (13.0-80.8) | (0.00-0.28) | 0.002 | (1.7-53.8)  | (12.9-80.0) | (0.00-0.24) | 0.003  | (1.9-37.4)  | (13.0-80.6) | (0.00-0.25) | 0.002 | (2.9-38.9)  | (13.0-80.6) | (0.00-0.28) | 0.002 | (12.8-79.3) |

CI, confidence interval.

<sup>1</sup> Low GI  $\leq 55$ , medium GI 56-69, high GI  $\geq 70$ .

<sup>2</sup> Low GL  $\leq 10$ , medium GL 11-19, high GL  $\geq 20$ .

<sup>3</sup> Metrics were applied per 10g of total carbohydrate: [1]  $\geq 1$ g fiber (10:1), [2]  $\geq 1$ g fiber and  $< 1$ g free sugars (10:1:1), [3]  $\geq 1$ g fiber and  $< 2$ g free sugars (10:1:2); and [4]  $\geq 1$ g fiber and, per 1 g of fiber,  $< 2$ g free sugars (10:1|1:2).

<sup>4</sup> Yes, foods that met the respective carbohydrate metric.

<sup>5</sup> No, foods that did not meet the respective carbo-hydrate metric.

When weighted by the population frequency of consumption, a higher proportion of grain foods had higher GI when compared to the non-weighted analysis (38.7% vs. 15.2%, respectively) indicating that food items with higher GI were more frequently consumed (Supplementary Table 4). All carbohydrate metrics identified food items more likely to be low GI than medium GI (P-value $<0.05$ ). More than 1 in each 3 foods meeting the metrics were low GI (ranging from 35.7% to 65.8% across metrics), compared to only 1 in 10 foods not meeting the metrics (ranging from 10.1% to 10.2%). However, approximately half of foods meeting the metrics were high GI (ranging from 22.7% to 56.8%), compared with 4 in 10 foods not meeting the metrics (ranging from 38.0% to 39.0%) (Table S5).

According to categories of GL, higher proportion of grain foods had higher GL when the weighted analysis was compared to the non-weighted analysis (42.8% vs. 35.7%, respectively) (Table S5). All carbohydrate metrics identified food items more likely to be low GL than medium or high GL (P-value $<0.05$ ), and more than 1 in each 3 foods meeting the metrics were low GI (ranging from 33.6% to 70.7% across metrics), compared to less than 1 in 10 foods not meeting the metrics (ranging from 3.8% to 3.9%).

**Table S6.** Comparison of consumed grain foods meeting at least one criterion of the front-of-pack warning labels according to carbohydrate metrics, 2015 Health Survey of Sao Paulo (n=244).

| Carbohydrate metrics <sup>1</sup>                 | Front-of-pack warning labels |         |                             |         |                             |         |                   |         |
|---------------------------------------------------|------------------------------|---------|-----------------------------|---------|-----------------------------|---------|-------------------|---------|
|                                                   | ANVISA <sup>2</sup>          |         | Chile 1 <sup>st</sup> stage |         | Chile 3 <sup>rd</sup> stage |         | PAHO              |         |
|                                                   | % (95%CI)                    | P-value | % (95%CI)                   | P-value | % (95%CI)                   | P-value | % (95%CI)         | P-value |
| 10:1                                              |                              |         |                             |         |                             |         |                   |         |
| No <sup>3</sup>                                   | 70.4 (63.7-76.3)             | <0.001  | 70.4 (63.7-76.3)            | 0.001   | 87.9 (82.6-91.7)            | 0.001   | 88.3 (83.2-92.1)  | 0.002   |
| Yes <sup>4</sup>                                  | 26.3 (14.6-42.7)             |         | 36.8 (23.0-53.3)            |         | 65.8 (49.3-79.2)            |         | 68.4 (51.9-81.3)  |         |
| 10:1:1                                            |                              |         |                             |         |                             |         |                   |         |
| No                                                | 69.1 (62.6-74.9)             | <0.001  | 69.1 (62.6-74.9)            | <0.001  | 88.2 (83.2-91.8)            | <0.001  | 89.1 (84.2-92.6)  | <0.001  |
| Yes                                               | 12.5 (4.0-33.1)              |         | 29.2 (14.3-50.4)            |         | 50.0 (30.5-69.5)            |         | 50.0 (30.5-69.5)  |         |
| 10:1:2                                            |                              |         |                             |         |                             |         |                   |         |
| No                                                | 70.6 (64.1-76.3)             | <0.001  | 70.1 (63.6-75.9)            | <0.001  | 88.3 (83.2-92.0)            | <0.001  | 88.8 (83.8-92.4)  | <0.001  |
| Yes                                               | 13.3 (5.0-31.1)              |         | 30.0 (16.2-48.8)            |         | 56.7 (38.5-73.2)            |         | 60.0 (41.6-76.0)  |         |
| 10:1 1:2                                          |                              |         |                             |         |                             |         |                   |         |
| No                                                | 70.3 (63.7-76.1)             | <0.001  | 69.8 (63.2-75.7)            | <0.001  | 88.2 (83.1-91.9)            | <0.001  | 88.7 (83.6-92.3)  | <0.001  |
| Yes                                               | 18.8 (8.5-36.4)              |         | 34.4 (19.9-52.5)            |         | 59.4 (41.6-75.0)            |         | 62.5 (44.5-77.6)  |         |
| Overall                                           | 63.5 (57.3-69.4)             |         | 65.2 (58.9-70.9)            |         | 84.4 (79.3-88.5)            |         | 85.2 (80.2-89.2)  |         |
| Weighted by frequency of consumption <sup>5</sup> |                              |         |                             |         |                             |         |                   |         |
| 10:1                                              |                              |         |                             |         |                             |         |                   |         |
| No                                                | 40.7 (13.1-75.8)             | 0.28    | 21.8 (8.3-46.0)             | 0.90    | 46.8 (15.8-80.4)            | 0.40    | 99.5 (97.5-99.9)  | 0.37    |
| Yes                                               | 18.5 (5.7-46.1)              |         | 23.6 (7.8-53.2)             |         | 68.6 (32.6-90.8)            |         | 99.0 (91.6-99.9)  |         |
| 10:1:1                                            |                              |         |                             |         |                             |         |                   |         |
| No                                                | 40.4 (13.3-74.9)             | 0.14    | 21.8 (8.5-45.4)             | 0.86    | 47.9 (16.8-80.8)            | 0.70    | 48.0 (9.17- 80.8) | 0.67    |
| Yes                                               | 10.7 (1.97-41.9)             |         | 24.9 (6.5-61.0)             |         | 37.7 (12.1-72.7)            |         | 36.9 (11.8-71.9)  |         |
| 10:1:2                                            |                              |         |                             |         |                             |         |                   |         |
| No                                                | 41.1 (13.4-75.8)             | 0.05    | 22.1 (8.5-46.4)             | 0.59    | 47.1 (16.1-80.5)            | 0.56    | 47.1 (16.1-80.5)  | 0.52    |
| Yes                                               | 6.4 (1.2-27.4)               |         | 14.6 (3.7-43.1)             |         | 63.4 (24.8-90.1)            |         | 65.2 (26.0-90.9)  |         |
| 10:1 1:2                                          |                              |         |                             |         |                             |         |                   |         |
| No                                                | 41.0 (13.3-75.8)             | 0.07    | 22.0 (8.4-46.3)             | 0.73    | 47.0 (16.0-80.5)            | 0.53    | 47.0 (16.0-80.5)  | 0.49    |
| Yes                                               | 9.3 (2.3-30.7)               |         | 17.2 (4.9-45.4)             |         | 64.5 (26.4-90.2)            |         | 66.2 (27.6-91.0)  |         |
| Overall                                           | 39.8 (13.4-73.9)             |         | 21.9 (8.7-45.0)             |         | 47.7 (17.1-80.1)            |         | 47.7 (9.2-80.2)   |         |

CI, confidence interval.

<sup>1</sup> Metrics were applied per 10g of total carbohydrate: 1)  $\geq 1$ g fiber (10:1), 2)  $\geq 1$ g fiber and  $< 1$ g free sugars (10:1:1), 3)  $\geq 1$ g fiber and  $< 2$ g free sugars (10:1:2); and 4)  $\geq 1$ g fiber and, per 1 g of fiber,  $< 2$ g free sugars (10:1|1:2).

<sup>2</sup> The National Health Surveillance Agency (*Agência Nacional de Vigilância Sanitária* - Anvisa) front-of-packing warning label tags foods with saturated fat  $\geq 6$  g/100 g, added sugar  $\geq 15$  g/100 g, or sodium  $\geq 600$  mg/100 g. Grains and flours without sugar, saturated fat or sodium added to the product were not eligible to receive the warning label (n=20). The 1<sup>st</sup> stage of Chilean warning label tagged foods with energy  $\geq 350$  kcal/100 g, saturated fat  $\geq 6$  g/100 g, total sugar  $\geq 22.5$  g/100 g, or sodium  $\geq 800$  mg/100 g. In the 3<sup>rd</sup> stage, foods with energy  $\geq 275$  kcal/100 g, saturated fat  $\geq 4$  g/100 g, total sugar  $\geq 10$  g/100 g, sodium  $\geq 40$  mg/100 g are tagged. Foods without sugar, sodium or fat added to the product were not eligible to receive the Chilean warning label (n=27). The Pan American Health Organization (PAHO) warning label tags processed and ultraprocessed foods with total fat  $\geq 30\%$  food total energy (FTE), saturated fat  $\geq 10\%$  FTE, trans fat  $\geq 1\%$  FTE, free sugar  $\geq 10\%$  FTE, sodium  $\geq 1$ mg/1 kcal, or the presence of non-nutritive sweetener (n=216).

<sup>3</sup> No, foods that did not meet the respective carbo-hydrate metric.

<sup>4</sup> Yes, foods that met the respective carbo-hydrate metric.

<sup>5</sup> Products were weighted by their actual reported consumption levels (products consumed more frequently received larger weight).

The proportion of grain products receiving at least one warning label was lower when the frequency of consumption was considered for all systems considered (Table S6), indicating that food items with at least one warning label were less frequently consumed. Results weighted by the population frequency of consumption were not significant when the foods meeting at least one criterion of the front-of-pack warning labels were compared according to meeting or not meeting the carbohydrate metrics (Table S6).

**Table S7.** Contents of critical nutrients in nutrient profiling models according to carbohydrate quality metrics, 2015 Health Survey of Sao Paulo.

| Critical nutrients <sup>1</sup> | 10:1 <sup>2</sup> |               |                 |               |                         |         | 10: 1:1      |               |              |               |              |         |
|---------------------------------|-------------------|---------------|-----------------|---------------|-------------------------|---------|--------------|---------------|--------------|---------------|--------------|---------|
|                                 | Yes <sup>3</sup>  |               | No <sup>4</sup> |               | Diff. (SE) <sup>5</sup> | P-value | Yes          |               | No           |               | Diff. (SE)   | P-value |
|                                 | μ<br>(SE)         | med<br>(IQR)  | μ<br>(SE)       | med<br>(IQR)  |                         |         | μ<br>(SE)    | med<br>(IQR)  | μ<br>(SE)    | med<br>(IQR)  |              |         |
| Energy (kcal)                   | 315.4 (14.5)      | 339.6 (150.1) | 337.5 (7.1)     | 349.2 (140.6) | -22.2 (16.0)            | 0.17    | 313.7 (18.9) | 340.7 (138.1) | 336.3 (6.8)  | 348.4 (143.2) | -22.6 (19.7) | 0.25    |
| Total sugar (g)                 | 8.4 (1.8)         | 3.9 (14.3)    | 19.8 (1.1)      | 20.9 (29.1)   | -11.4 (2.1)             | <0.001  | 2.7 (0.9)    | 0.8 (3.3)     | 19.7 (1.0)   | 20.3 (28.2)   | -17.0 (1.3)  | <0.001  |
| Free sugar (g)                  | 5.4 (1.3)         | 0.9 (10.0)    | 17.2 (1.1)      | 17.1 (28.0)   | -11.8 (1.7)             | <0.001  | 0.71 (0.3)   | 0.1 (0.4)     | 17.0 (1.0)   | 15.6 (26.7)   | -16.3 (1.1)  | <0.001  |
| Added sugar (g)                 | 5.4 (1.3)         | 0.9 (10.0)    | 17.1 (1.1)      | 16.9 (28.0)   | -11.7 (1.7)             | <0.001  | 0.71 (0.3)   | 0.1 (0.4)     | 16.9 (1.0)   | 15.6 (26.7)   | -16.2 (1.1)  | <0.001  |
| Total fat (g)                   | 8.0 (1.2)         | 6.2 (10.2)    | 11.4 (0.5)      | 10.2 (12.5)   | -3.4 (1.3)              | 0.01    | 6.9 (1.4)    | 5.2 (7.6)     | 11.3 (0.5)   | 10.4 (12.6)   | -4.4 (1.5)   | 0.004   |
| Saturated fat (g)               | 2.2 (0.6)         | 1.1 (1.7)     | 4.3 (0.3)       | 3.3 (5.3)     | -2.1 (0.7)              | 0.001   | 1.8 (0.7)    | 0.8 (1.2)     | 4.3 (0.3)    | 3.2 (5.3)     | -2.5 (0.7)   | 0.001   |
| Trans fat (g)                   | 0.2 (0.1)         | 0.1 (0.2)     | 0.8 (0.1)       | 0.2 (0.7)     | -0.6 (0.1)              | <0.001  | 0.1 (0.1)    | 0.1 (0.1)     | 0.8 (0.1)    | 0.2 (0.6)     | -0.7 (0.1)   | <0.001  |
| Sodium (mg)                     | 263.7 (43.4)      | 176.0 (456.4) | 277.7 (17.7)    | 225.5 (383.0) | -14.0 (46.5)            | 0.76    | 274.8 (61.2) | 192.0 (479.9) | 275.6 (16.9) | 219.4 (390.6) | -0.8 (62.5)  | 0.99    |

  

| Critical nutrients <sup>a</sup> | 10:1:2       |               |              |               |              |         | 10:1 1:2     |               |              |               |              |         |
|---------------------------------|--------------|---------------|--------------|---------------|--------------|---------|--------------|---------------|--------------|---------------|--------------|---------|
|                                 | Yes          |               | No           |               | Diff. (SE)   | P-value | Yes          |               | No           |               | Diff. (SE)   | P-value |
|                                 | μ<br>(SE)    | med<br>(IQR)  | μ<br>(SE)    | med<br>(IQR)  |              |         | μ<br>(SE)    | med<br>(IQR)  | μ<br>(SE)    | med<br>(IQR)  |              |         |
| Energy (kcal)                   | 306.5 (16.2) | 335.4 (143.0) | 338.0 (6.7)  | 349.2 (144.3) | -31.5 (17.4) | 0.07    | 313.6 (15.9) | 340.7 (144.7) | 337.2 (6.9)  | 348.4 (141.8) | -23.6 (17.2) | 0.173   |
| Total sugar (g)                 | 4.7 (1.5)    | 1.5 (4.4)     | 20.0 (1.1)   | 20.8 (28.6)   | -15.3 (1.8)  | <0.001  | 5.6 (1.6)    | 2.6 (4.7)     | 19.9 (1.1)   | 20.9 (28.8)   | -14.3 (1.9)  | <0.001  |
| Free sugar (g)                  | 2.0 (0.6)    | 0.1 (4.0)     | 17.2 (1.0)   | 16.3 (27.3)   | -15.3 (1.2)  | <0.001  | 2.8 (0.8)    | 0.0 (4.2)     | 17.3 (1.0)   | 16.5 (27.5)   | -14.3 (1.3)  | <0.001  |
| Added sugar (g)                 | 2.0 (0.6)    | 0.1 (4.0)     | 17.2 (1.0)   | 16.3 (27.3)   | -15.2 (1.2)  | <0.001  | 2.8 (0.8)    | 0.0 (4.2)     | 17.2 (1.0)   | 16.4 (27.5)   | -14.3 (1.3)  | <0.001  |
| Total fat (g)                   | 6.3 (1.2)    | 3.1 (7.3)     | 11.5 (0.5)   | 10.7 (12.3)   | -5.1 (1.3)   | <0.001  | 6.7 (1.1)    | 3.9 (8.8)     | 11.5 (0.5)   | 10.5 (12.3)   | -4.8 (1.3)   | <0.001  |
| Saturated fat (g)               | 1.6 (0.6)    | 0.7 (1.2)     | 4.4 (0.3)    | 3.3 (5.2)     | -2.8 (0.7)   | <0.001  | 1.6 (0.5)    | 0.7 (1.5)     | 4.4 (0.3)    | 3.3 (5.2)     | -2.8 (0.6)   | <0.001  |
| Trans fat (g)                   | 0.1 (0.1)    | 0.1 (0.2)     | 0.8 (0.1)    | 0.2 (0.7)     | -0.7 (0.1)   | <0.001  | 0.1 (0.0)    | 0.0 (0.1)     | 0.8 (0.1)    | 0.2 (0.7)     | -0.7 (0.1)   | <0.001  |
| Sodium (mg)                     | 301.3 (52.7) | 262.0 (472.3) | 271.9 (17.2) | 210.4 (376.0) | 29.4 (54.8)  | 0.59    | 291.5 (49.8) | 224.0 (466.1) | 273.1 (17.3) | 217.2 (376.2) | 18.5 (52.2)  | 0.724   |

μ, mean; SE, standard error; med, median; IQR, interquartile range; Diff., difference.

<sup>1</sup> Sweeteners were excluded from the analyses due to lack of information regarding amount added to products available in Brazil.

<sup>2</sup> Metrics were applied per 10g of total carbohydrate: [1] ≥1g fiber (10:1), [2] ≥1g fiber and <1g free sugars (10:1:1), [3] ≥1g fiber and <2g free sugars (10:1:2); and [4] ≥1g fiber and, per 1 g of fiber, < 2g free sugars (10:1|1:2).

<sup>3</sup> Yes, foods that met the respective carbo-hydrate metric.

<sup>4</sup> No, foods that did not meet the respective carbo-hydrate metric.

<sup>5</sup> β coefficient for linear regression model with robust variance.

**Figure S1.** Flowchart of study participants, 2015 Health Survey of Sao Paulo.

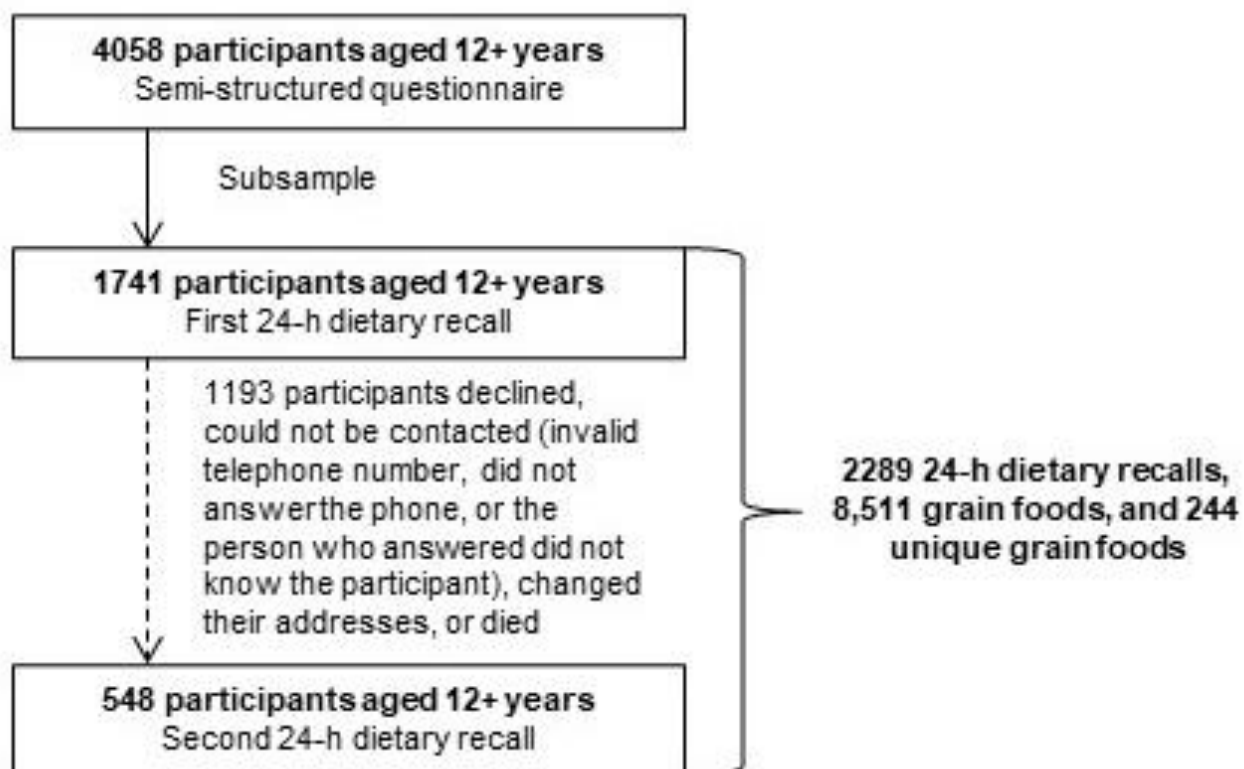

Supplement: s1 [file s1]
